# Supplementary material for: Effect of cold stress on photosynthetic physiological characteristics and molecular mechanism analysis in cold-resistant cotton (ZM36) seedlings
Source: Frontiers journal article supplement (doi:10.3389/fpls.2024.1396666), 2024-05-13
Supplement: Table_1.XLSX [file Table_1.XLSX]

## Sheet: Table.S1
Primer ID	Sequence(5'-3')
Qpcr-GH_A01G1052_F	CACCACTCAGAGACGCCG
Qpcr-GH_A01G1052_R	TCAATTGGGGCAGCAGCA
Qpcr-GH_A02G0898_F	CGTCGGAACCCTTTGCGT
Qpcr-GH_A02G0898_R	CCGCCGCCCATATCTGAT
Qpcr-GH_A05G1366_F	GGTCGGGTTGTTGGAGCA
Qpcr-GH_A05G1366_R	GCATGGCCGGCTGAAAAG
Qpcr-GH_A06G0948_F	TATGCTGCAGTGTGGGGC
Qpcr-GH_A06G0948_R	CCCCGGAAAGGAACGTGG
Qpcr-GH_A07G1351_F	GGGGGATGCCTCATGTCG
Qpcr-GH_A07G1351_R	GGCCAACAATTGTCGCCC
Qpcr-GH_A12G1885_F	CGCTCCATTGCCTGCACT
Qpcr-GH_A12G1885_R	TGGCTGCCCCTTTCTTCG
Qpcr-GH_A13G1204_F	TGATGGAGTTGCCGCCTG
Qpcr-GH_A13G1204_R	AGCGGCACTGAAGTTGCT
Qpcr-GH_D05G2845_F	TCCATCGGCCTCTGGAGT
Qpcr-GH_D05G2845_R	CGCAACCCATCGGCAAAC
Qpcr-GH_D06G1877_F	TCACCGGTGCTTCTTCCG
Qpcr-GH_D06G1877_R	GATGACGGTGGGCCCAAA
Qpcr-GH_D09G2404_F	TCGGCGGATCGACAGCTA
Qpcr-GH_D09G2404_R	ACCAGCTTCAATGGGGCT
Qpcr-GH_D10G1486_F	TTTCCGGTGGCAGGATCG
Qpcr-GH_D10G1486_R	GCCCCGGATCGAGTTCTG
Qpcr-GH_D10G2061_F	CCTGCCCGGGTCCATTAC
Qpcr-GH_D10G2061_R	GGGGGATTGCACCAACCA
VIGS-GhPLATZ_F	CGgaattcTGTGAGCGTAGCCTTGTC
VIGS-GhPLATZ_R	GGggtaccTGTGGAATCCCCTTTCTT
Qpcr-GhPLATZ_F	GCAGCAGCAGCCATCGAA
Qpcr-GhPLATZ_R	GGTGGGGGTGTTGATGGG
Qpcr-GhUBQ7_F	GAAGGCATTCCACCTGACCAAC
Qpcr-GhUBQ7_R	CTTGACCTTCTTCTTCTTGTGCTTG

## Sheet: Table.S2
Pn	①	②	③
T25	14.4391	12.2596	11.5575
T15	11.7316	8.28129	8.37809
T10	6.41264	5.32356	6.18238
T4	1.4	1.0653	1.06039
Gs	①	②	③
T25	0.34766	0.349504	0.28636
T15	0.116521	0.0799662	0.0830912
T10	0.0328344	0.0310158	0.0264785
T4	0.0125428	0.0109272	0.0139542
Ci	①	②	③
T25	423.018	430.376	423.397
T15	436.079	459.897	430.155
T10	462.871	491.163	581.137
T4	679.684	744.655	664.747
Tr	①	②	③
T25	5.00104	5.02354	4.6821
T15	2.39636	2.14174	2.35612
T10	0.430514	0.517396	0.418324
T4	0.211416	0.239711	0.25761
Fv/Fm	①	②	③
T25	0.790333	0.795	0.8
T15	0.733333	0.778667	0.7945
T10	0.650333	0.704333	0.607
T4	0.281667	0.273333	0.378
Piabs	①	②	③
T25	3.18367	4.81067	4.9045
T15	2.028	2.23433	2.664
T10	0.814	1.151	1.5995
T4	0.126333	0.121333	0.0935
Fo/Fm	①	②	③
T25	0.2098	0.205333	0.1996
T15	0.266633	0.2216	0.20555
T10	0.316333	0.295433	0.293
T4	0.685	0.640867	0.67195
Fv/Fo	①	②	③
T25	3.77533	3.87067	4.013
T15	2.79733	3.226	3.116
T10	1.91267	2.17133	2.231
T4	0.495333	0.617333	0.6485

## Sheet: Table.S3
SampleID	Total Reads	Clean reads	Clean bases	GC(%)	Q30(%)	Mapped Reads	Uniq Mapped Reads	Multiple Map Reads
T25-1	45384602	22692301	6807690300	43.8	95.04	43,333,600 (95.48%)	41,230,117 (90.85%)	2,103,483 (4.63%)
T25-2	45127818	22563909	6769172700	43.71	90.23	42,471,385 (94.11%)	40,579,513 (89.92%)	1,891,872 (4.19%)
T25-3	48625694	24312847	7293854100	43.67	90.7	45,440,426 (93.45%)	43,384,308 (89.22%)	2,056,118 (4.23%)
T15-1	48833606	24416803	7325040900	43.46	94.47	46,580,897 (95.39%)	44,627,492 (91.39%)	1,953,405 (4.00%)
T15-2	49397772	24698886	7409665800	43.71	90.16	46,336,781 (93.80%)	44,181,125 (89.44%)	2,155,656 (4.36%)
T15-3	45806752	22903376	6871012800	43.84	94.49	43,235,933 (94.39%)	41,139,381 (89.81%)	2,096,552 (4.58%)
T10-1	47038446	23519223	7055766900	43.72	94.31	44,646,793 (94.92%)	42,765,489 (90.92%)	1,881,304 (4.00%)
T10-2	48241966	24120983	7236294900	43.77	94.95	46,083,453 (95.53%)	43,431,067 (90.03%)	2,652,386 (5.50%)
T10-3	42998574	21499287	6449786100	43.99	94.75	40,752,686 (94.78%)	38,888,420 (90.44%)	1,864,266 (4.34%)
T4-1	47754844	23877422	7163226600	44.07	94.82	45,310,435 (94.88%)	42,660,958 (89.33%)	2,649,477 (5.55%)
T4-2	42946258	21473129	6441938700	43.85	90.45	40,195,924 (93.60%)	37,771,687 (87.95%)	2,424,237 (5.64%)
T4-3	40476800	20238400	6071520000	44.34	94.84	38,041,951 (93.98%)	35,264,474 (87.12%)	2,777,477 (6.86%)

## Sheet: Table.S4
Relative expression level
Sample	Genes	Ct	Ct Means	△Ct	Relative expression level	△△Ct	2^(-△△Ct)	Means	SD
pTRV2:00	UBQ7	18.6772	18.3816
pTRV2:00	UBQ7	18.1875
pTRV2:00	UBQ7	18.2802
pTRV2:00	Mgene	24.1494		5.76776	5.85242	-0.0846533	1.06043
pTRV2:00	Mgene	24.2938		5.91213		0.0597129	0.959455
pTRV2:00	Mgene	24.259		5.87736		0.0249404	0.982861	1.00092	0.0528547
pTRV2:GhPLATZ	UBQ7	23.2455	23.3428
pTRV3:GhPLATZ	UBQ7	23.1697
pTRV4:GhPLATZ	UBQ7	23.6133
pTRV5:GhPLATZ	Mgene	30.9972		7.65441		1.80199	0.286778
pTRV6:GhPLATZ	Mgene	30.5415		7.1987		1.34628	0.393304
pTRV7:GhPLATZ	Mgene	30.8976		7.5548		1.70238	0.307278	0.32912	0.0565222
pTRV2::00	pTRV2::GhPLATZ
1.06043	0.286778			1.06043	0.959455	0.982861
0.959455	0.393304			0.286778	0.393304	0.307278
0.982861	0.307278
Electrical conductivity(%)
	①	②	③	①	②	③	①	②	③
pTRV2::00	208	195	214	402	417	420	0.517413	0.467626	0.509524	0.498188	0.0267595
pTRV2::GhPLATZ	212	218	211	549	532	567	0.386157	0.409774	0.372134	0.389355	0.0190229	·
							51.7413	46.7626	50.9524	49.8188
							38.6157	40.9774	37.2134	38.9355
Prolin(ug/g)
	①	②	③
TRV:00	99.3014	79.4369	82.1816
TRV:GhPLATZ	61.3382	50.6144	57.421
